# Supplementary material for: Polymorphisms of pfcrt, pfmdr1, and K13-propeller genes in imported falciparum malaria isolates from Africa in Guizhou province, China
Source: Springer Nature journal article supplement (doi:10.1186/s12879-020-05228-8), 2020-07-16
Supplement: MOESM2 [file 18189750]

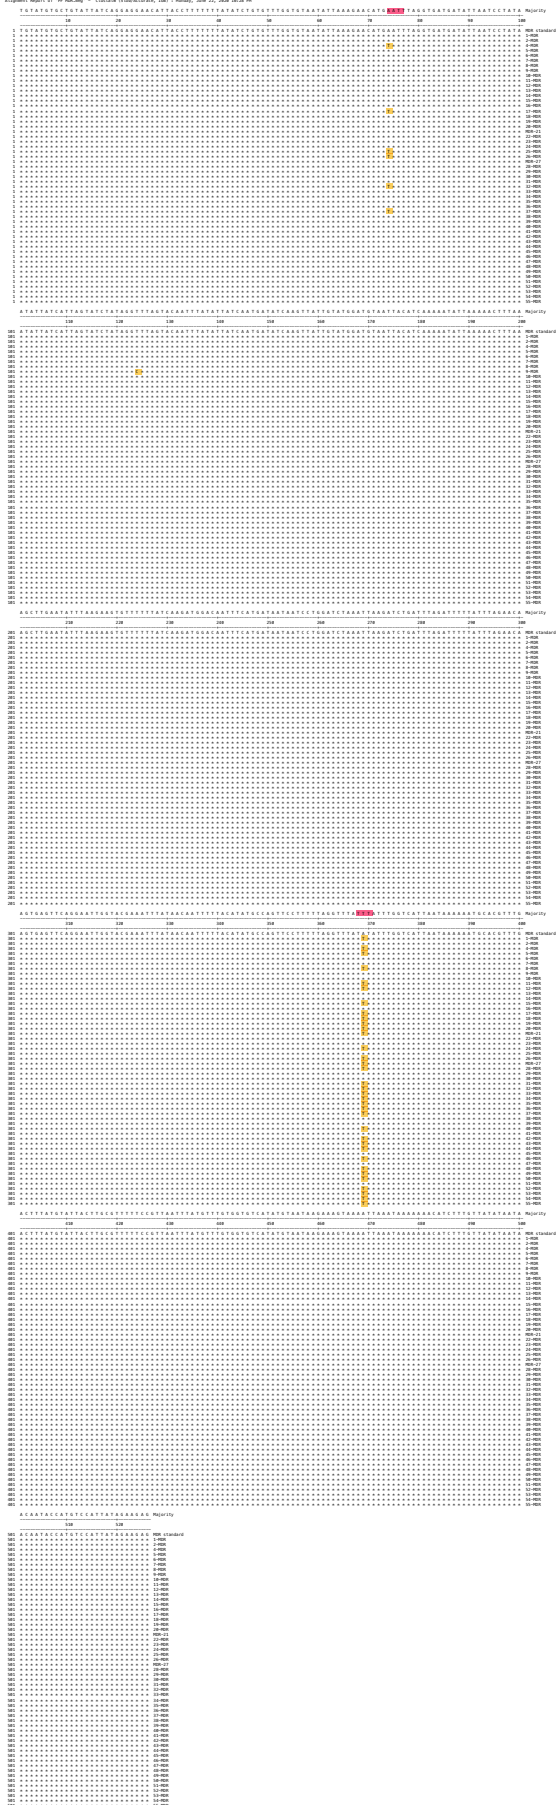

Fig. 2. Nucleotide sequence alignment of 9686669, 188P of Japanese Phyllocladus distichus from 9686669. The detected locus is highlighted in red, and the sequence polymorphism is marked in yellow.
