# Supplementary material for: Polymorphisms of pfcrt, pfmdr1, and K13-propeller genes in imported falciparum malaria isolates from Africa in Guizhou province, China
Source: Springer Nature journal article supplement (doi:10.1186/s12879-020-05228-8), 2020-07-16
Supplement: MOESM3 [file 18189750]

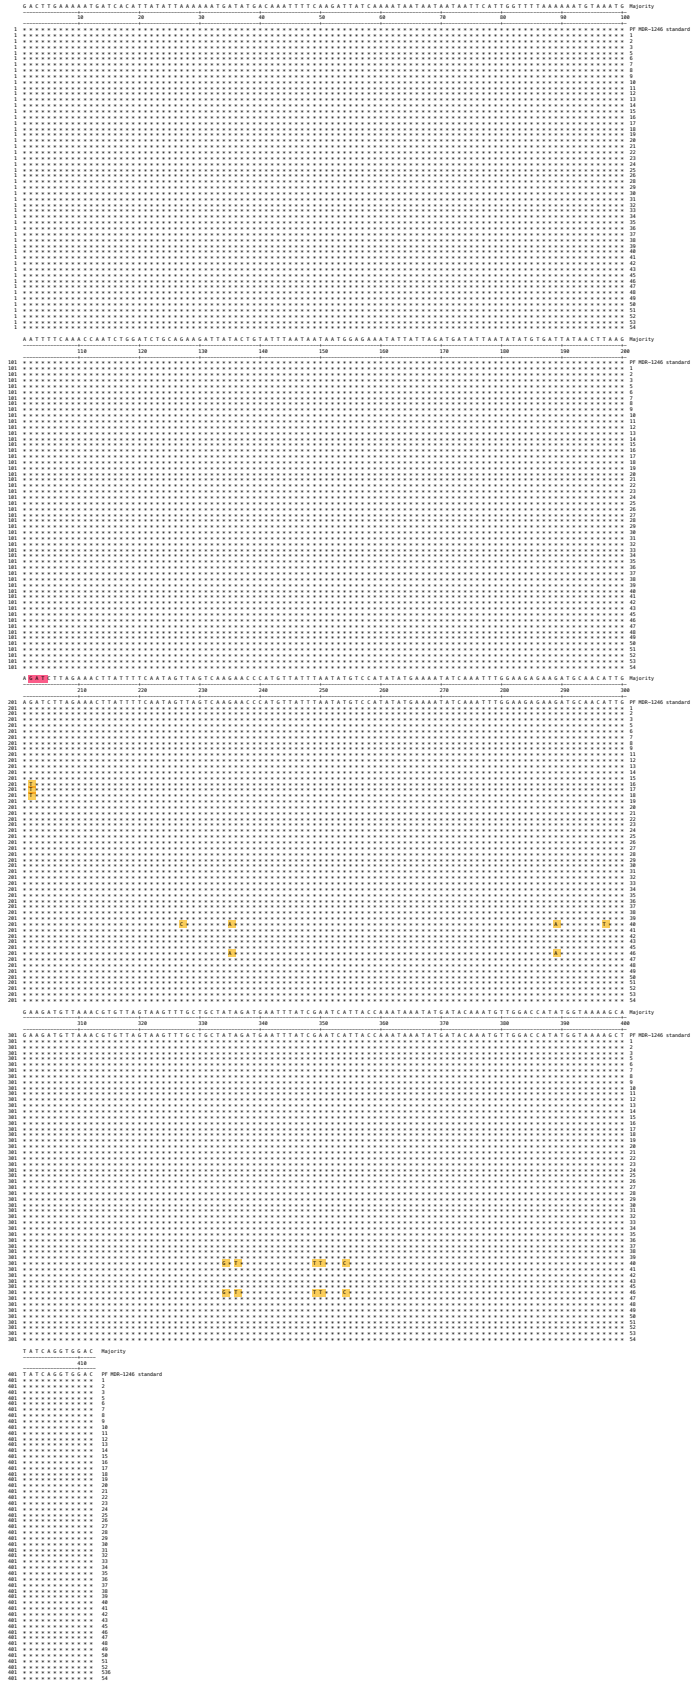

Fig. 3 Nucleotide sequence alignment of phi81 1246Y of imported *Plasmodium falciparum* isolates from Africa in Guinea-Bissau. The detected locus is highlighted in red, and the sequence polyplex is marked in yellow.
